# Supplementary material for: Interpretation of organic components from Positive Matrix Factorization of aerosol mass spectrometric data
Source: Copernicus journal article supplement (doi:10.5194/acp-9-2891-2009), 2009-05-05
Supplement: Supplementary file [file acp-9-2891-2009-supplement.pdf]

1 **SUPPLEMENTAL INFORMATION**

2  
3 for the paper

4  
5 **Interpretation and Sensitivity Analysis of Organic Components**  
6 **Extracted by Positive Matrix Factorization of Aerosol Mass**  
7 **Spectrometric Data**

8  
9 I. M. Ulbrich,<sup>1,2</sup> M. Canagaratna,<sup>3</sup> Q. Zhang,<sup>4</sup> D. Worsnop,<sup>3</sup> and J. L. Jimenez<sup>1,2,\*</sup>

10  
11 <sup>1</sup>Cooperative Institute for Research in the Environmental Sciences (CIRES), and <sup>2</sup>Department of Chemistry and  
12 Biochemistry, University of Colorado, Boulder, CO, 80309

13 <sup>3</sup>Aerodyne Research, Inc., Billerica, MA, 01821-3976

14 <sup>4</sup>Atmospheric Sciences Research Center, University at Albany, State University of New York, Albany, NY 12203

15 \*Corresponding author: email jose.jimenez@colorado.edu

16 **Weighting Factors for  $m/z$  44-Related Peaks**

17 The organic mass spectrum measured by the Q-AMS is estimated from the full measured  
 18 mass spectrum but application of a “fragmentation table” (Allan et al., 2004). Several of the  
 19  $m/z$ 's in the AMS organic spectrum are related to  $m/z$  44 by proportional constants in the  
 20 fragmentation table such that the signals,  $x$ , are related by

21 
$$x_{m/z\ 18} = x_{m/z\ 44} \quad (\text{SI-1})$$

22 
$$x_{m/z\ 17} = 0.27 x_{m/z\ 18} = 0.27 x_{m/z\ 44} \quad (\text{SI-2})$$

23 
$$x_{m/z\ 16} = 0.04 x_{m/z\ 18} = 0.04 x_{m/z\ 44} \quad (\text{SI-3})$$

24 and likewise their errors have the same relationships:

25 
$$\sigma_{m/z\ 18} = \sigma_{m/z\ 44} \quad (\text{SI-4})$$

26 
$$\sigma_{m/z\ 17} = 0.27 \sigma_{m/z\ 44} \quad (\text{SI-5})$$

27 
$$\sigma_{m/z\ 16} = 0.04 \sigma_{m/z\ 44} \quad (\text{SI-6})$$

28 Including all of these  $m/z$ 's gives duplicates the signal at  $m/z$  44 and gives excessive  
 29 weight to this large signal in the PMF fit. The group of duplicate peaks ( $m/z$ 's 16, 17, and 18)  
 30 could be omitted from the PMF input and then reconstructed afterwards, but it would be more  
 31 convenient to include them in the fit but weigh them so that the Q-contribution of the group is  
 32 the same as the Q-contribution if only  $m/z$  44 had been included.

33 In order to satisfy

34 
$$Q_{m/z\ 44\ \text{only}} = Q_{\text{all } m/z\ 44\text{-related ions}} \quad (\text{SI-7})$$

35 assume that the errors when all  $m/z$  44-related peaks are included must be multiplied by a factor  
 36  $a$  such that

37 
$$\sum_{j=1}^m \left( \frac{x_{m/z\ 44}}{\sigma_{m/z\ 44}} \right)^2 = \sum_{j=1}^m \left( \frac{x_{m/z\ 44}}{a^* \sigma_{m/z\ 44}} \right)^2 + \sum_{j=1}^m \left( \frac{x_{m/z\ 18}}{a^* \sigma_{m/z\ 18}} \right)^2 + \sum_{j=1}^m \left( \frac{x_{m/z\ 17}}{a^* \sigma_{m/z\ 17}} \right)^2 + \sum_{j=1}^m \left( \frac{x_{m/z\ 16}}{a^* \sigma_{m/z\ 16}} \right)^2 \quad (\text{SI-8})$$

38 Substituting Eqs. (SI-1) to (SI-6),

$$39 \sum_{j=1}^m \left( \frac{x_{m/z44}}{\sigma_{m/z44}} \right)^2 = \sum_{j=1}^m \left( \frac{x_{m/z44}}{a * \sigma_{m/z44}} \right)^2 + \sum_{j=1}^m \left( \frac{x_{m/z44}}{a * \sigma_{m/z44}} \right)^2 + \sum_{j=1}^m \left( \frac{0.27 x_{m/z44}}{a * 0.27 \sigma_{m/z44}} \right)^2 + \sum_{j=1}^m \left( \frac{0.04 x_{m/z44}}{a * 0.04 \sigma_{m/z44}} \right)^2$$

40 (SI-9)

41 all of the proportionality constants cancel, and the equation can be reduced to

$$42 \sum_{j=1}^m \left( \frac{x_{m/z44}}{\sigma_{m/z44}} \right)^2 = \frac{4}{a^2} \sum_{j=1}^m \left( \frac{x_{m/z44}}{\sigma_{m/z44}} \right)^2$$

(SI-10)

43 and  $a = 2$  (i.e.,  $a$  = the square root of the number of  $m/z$  44-related ions).

44 Analyses of HR-ToF-AMS data (Aiken et al., 2008) have led to revisions of the  
45 fragmentation table such that  $m/z$  28 is now assigned organic mass. When the revised  
46 fragmentation table is used, the scaling factor  $a$  for the error should be  $\text{sqrt}(5) = 2.24$  because  
47 there are five ions ( $m/z$ 's 44, 28, 18, 17, 16) related to  $m/z$  44.

48 **Calculation of the Angle between a Vector and a Plane**

49 The factor MS can be considered as vectors in a 270-dimensional space. Any two vectors  
50 in this space define a plane. Here we consider the plane defined by the HOA and OOA-1 MS  
51 vectors. Any 3<sup>rd</sup> vector in that 270-dimensional space will have an angle with respect to that  
52 plane. Any vector which is the linear combination of HOA and OOA-1 would lie exactly in that  
53 plane and have an angle of zero with respect to the plane. Any vector not in the HOA-OOA-1  
54 plane is not a linear combination of HOA and OOA-1, and its “distance” from the HOA-OOA-1  
55 plane can be quantified by the angle  $\alpha$  between the plane and the vector.

56 In linear algebra terms, let  $\mathbf{A}$  be a 270 x 2 matrix formed by combining the non-  
57 orthogonal, non-collinear column vectors  $\mathbf{HOA}$  and  $\mathbf{OOA-1}$  such that

58 
$$\mathbf{A} = (\mathbf{HOA}, \mathbf{OOA-1}) \tag{SI-11}$$

59 and  $\text{rank}(\mathbf{A}) = 2$ . A projection matrix  $\mathbf{P}$  may be constructed by

60 
$$\mathbf{P} = \mathbf{A}(\mathbf{A}^T\mathbf{A})^{-1}\mathbf{A}^T \tag{SI-12}$$

61 which gives the projection ( $\mathbf{w}$ ) of a third vector ( $\mathbf{v}$ , which is OOA-2 in the quoted example) onto  
62 the plane by

63 
$$\mathbf{P} \mathbf{v} = \mathbf{w} \tag{SI-13}$$

64 A right triangle between  $\mathbf{v}$  and the HOA-OOA-1 plane can be identified in which  $\mathbf{w}$  is the  
65 base (and lies in the HOA-OOA-1 plane),  $\mathbf{v}$  is the hypotenuse, and a vector  $\mathbf{z}$  could be drawn  
66 perpendicular to the plane to define the height (Olver and Shakiban, 2006). The cosine of the  
67 angle  $\alpha$  between  $\mathbf{V}$  and the plane can be defined by

68 
$$\cos \alpha = \frac{\|\mathbf{w}\|}{\|\mathbf{v}\|} \tag{SI-14}$$

69 and  $\alpha$  can be calculated with the inverse cosine function.



70

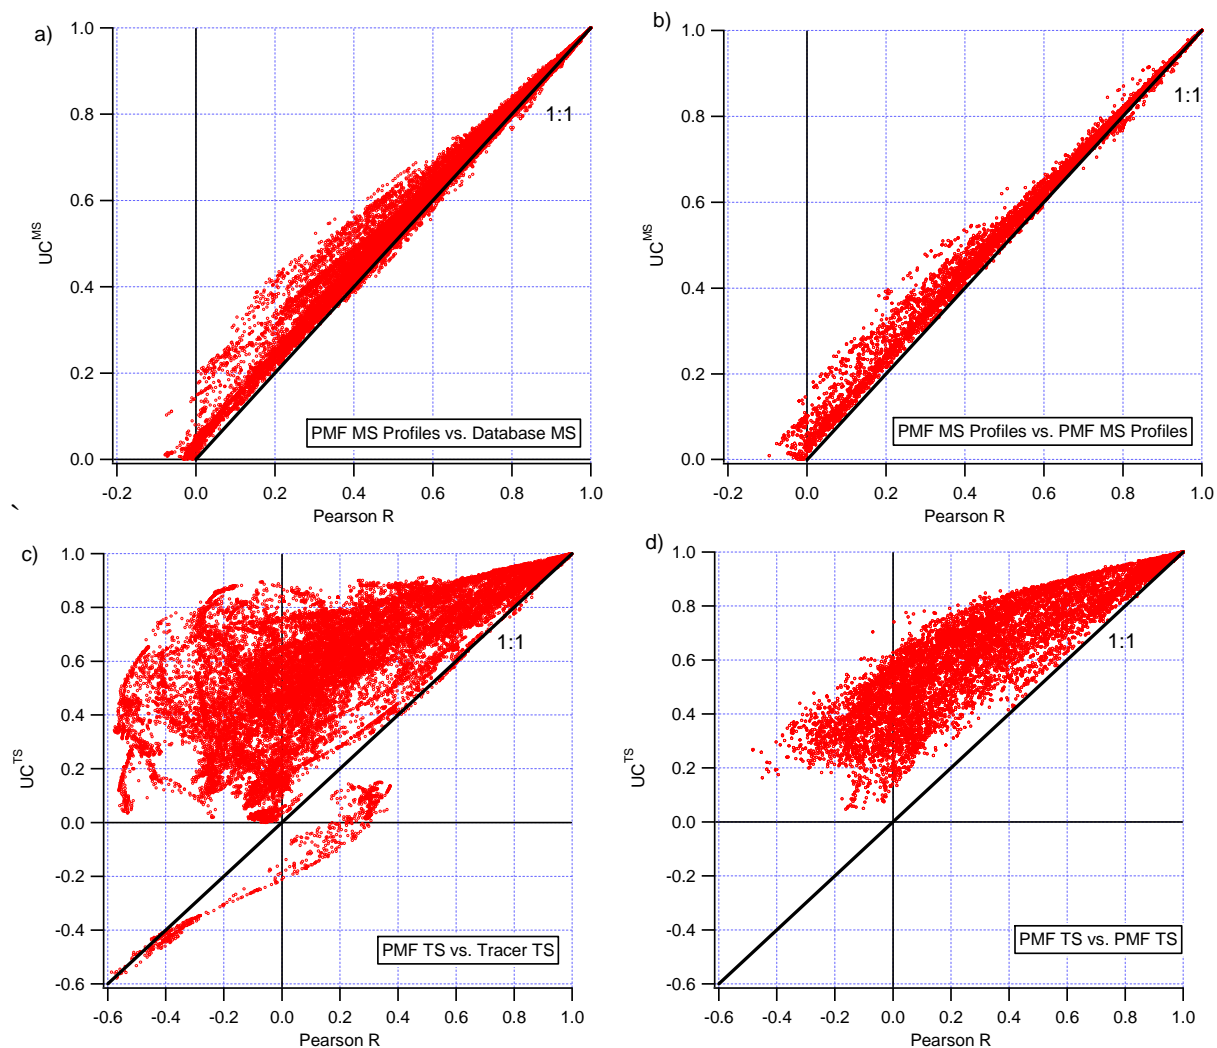

71

72 Figure S1. Comparisons of the uncentered correlation with Pearson R. All PMF factors are from  
 73 solutions of the real Pittsburgh case with solutions from 1 to 7 factors at FPEAKS from -3.0 to  
 74 +3.0. Sixty MS from the Mass Spectral Database are used for MS comparisons; 34 tracer TS are  
 75 used for TS comparisons. a) MS from PMF solutions vs. database MS; b) MS from PMF  
 76 solutions vs. MS from PMF solutions; c) TS from PMF solutions vs. tracer TS; d) TS from PMF  
 77 solutions vs. TS from PMF solutions.

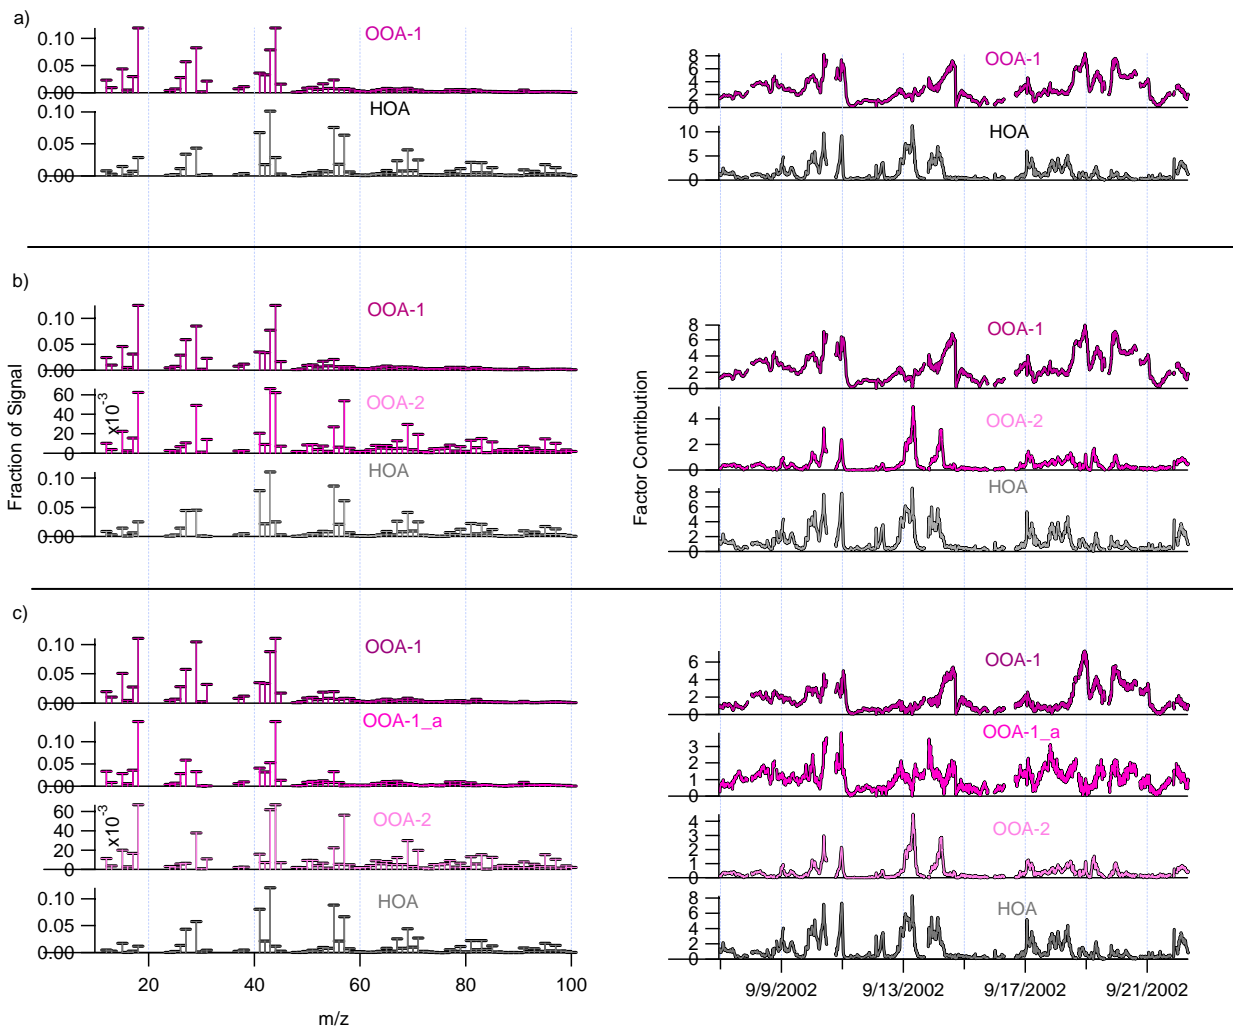

78  
 79 Figure S2. Solutions of the real Pittsburgh dataset in robust mode (thicker black markers) and the  
 80 non-robust mode (thinner colored lines and markers, in front) with a) 2 factors, b) 3 factors, and  
 81 c) 4 factors.

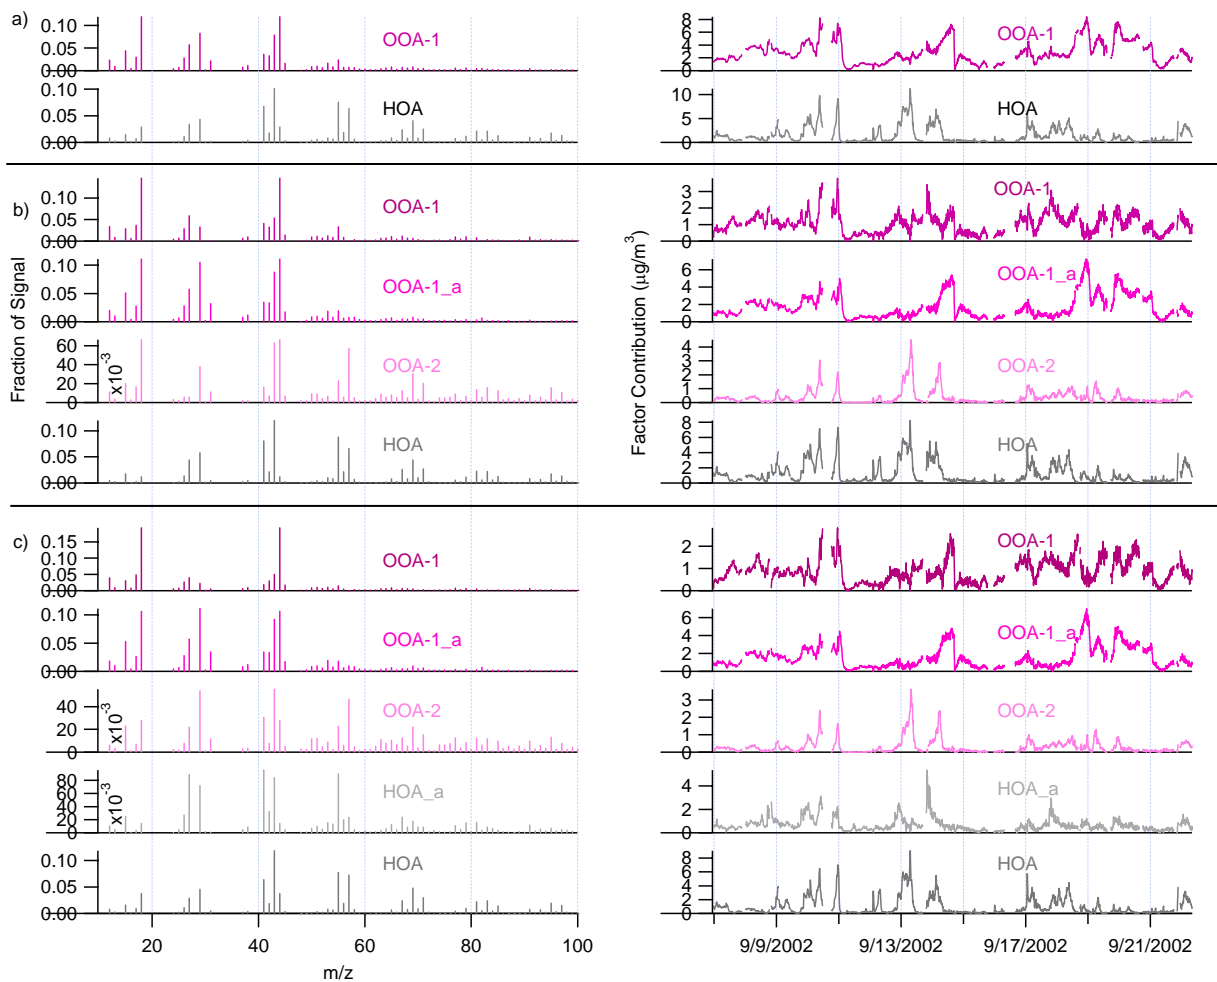

82  
 83 Figure S3. PMF solutions of the real Pittsburgh case with a) 2 factors, b) 4 factors, and c) 5  
 84 factors.

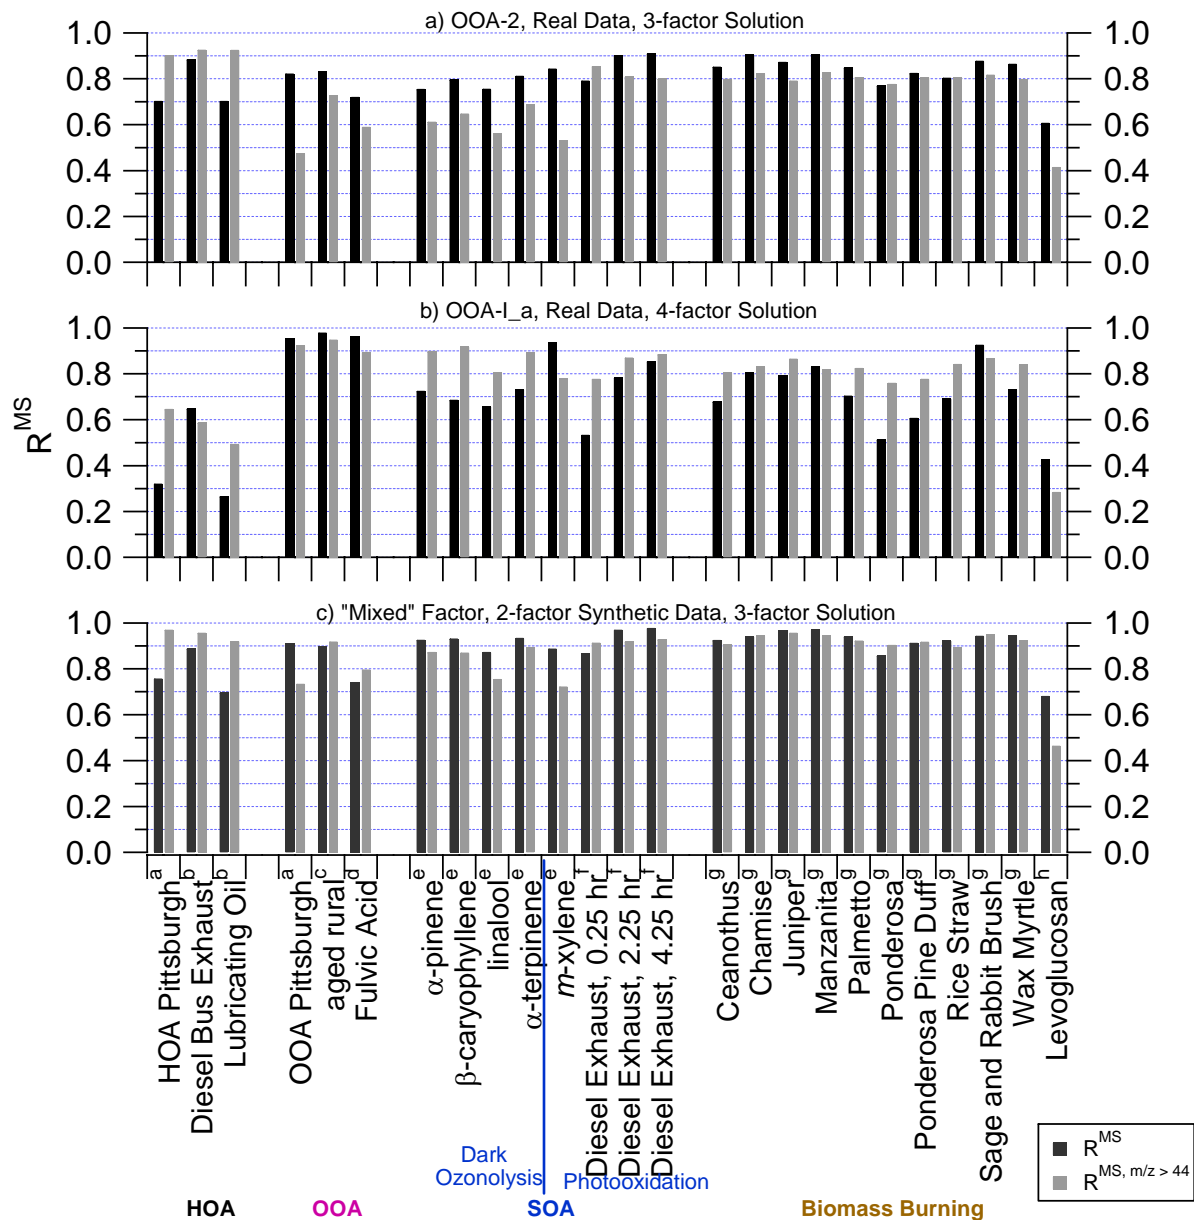

85  
 86 Figure S4.  $R^{MS}$  between representative spectra from the AMS Mass Spectral Database  
 87 (<http://cires.colorado.edu/jimenez-group/AMSSd>) and a) the third factor mass spectrum from the  
 88 3-factor PMF solution of the real Pittsburgh dataset, b) the fourth factor mass spectrum from the  
 89 4-factor PMF solution of the real Pittsburgh dataset, and c) the "mixed" factor mass spectrum  
 90 from the 3-factor PMF solution of 2-factor base case. Values are given in Table S1.  
 91 Superscripts denote the source of the reference spectra as follows: (a) Zhang et al., 2005; b)  
 92 Canagaratna et al., 2004; c) Alfarra et al., 2004; d) Alfarra, 2004; e) Bahreini et al., 2005; f)  
 93 Sage et al., 2007; g) I.M. Ulbrich, J. Kroll, J.A. Huffman, T. Onash, A. Trimborn, J.L. Jimenez,  
 94 unpublished spectra, FLAME-I, Missoula, MT, 2006; h) Schneider et al., 2006)

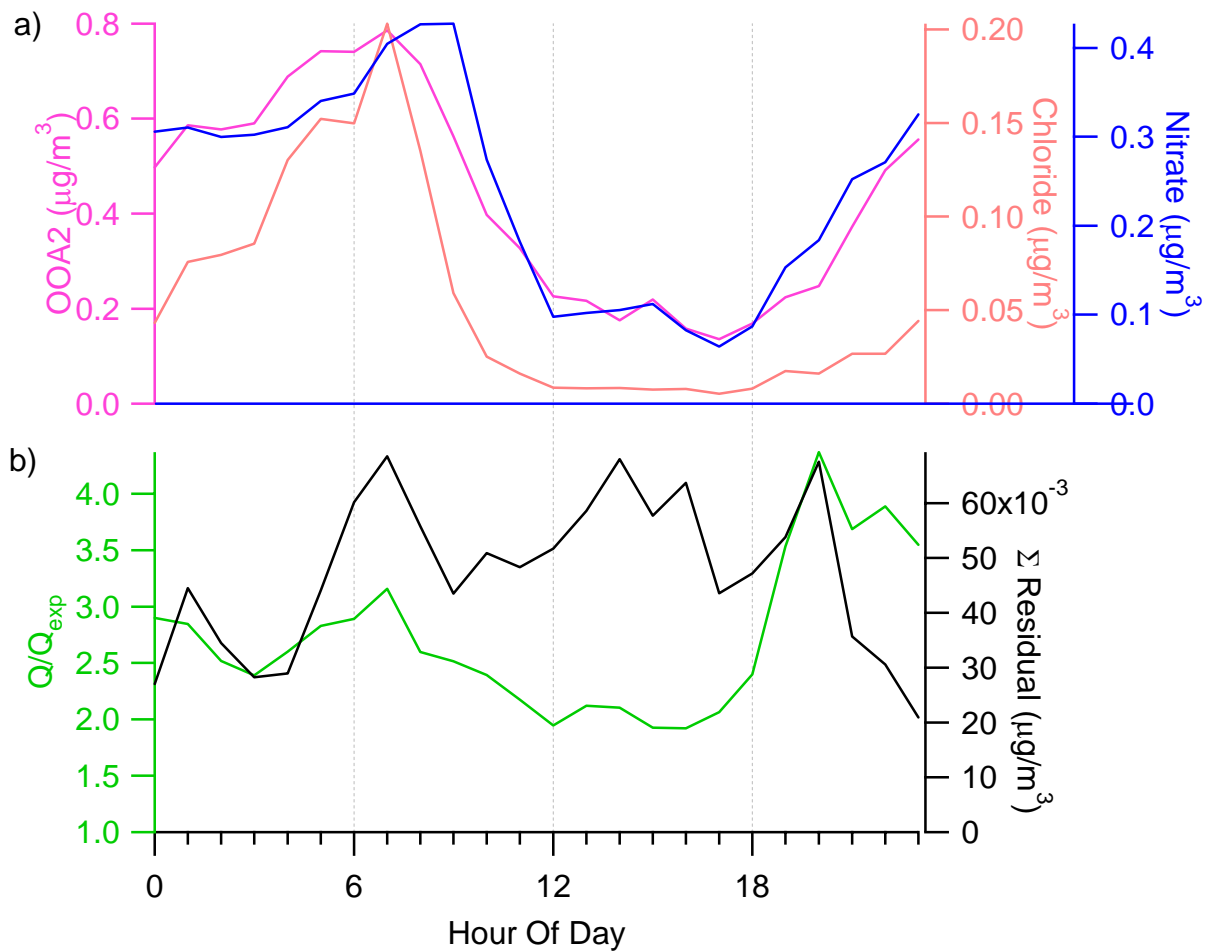

95  
 96 Figure S5. Diurnal profiles of a) OOA-2, Nitrate, and Chloride, and b)  $Q/Q_{\text{exp}}$  and the total  
 97 residual from the 3-factor solution of the real Pittsburgh dataset.

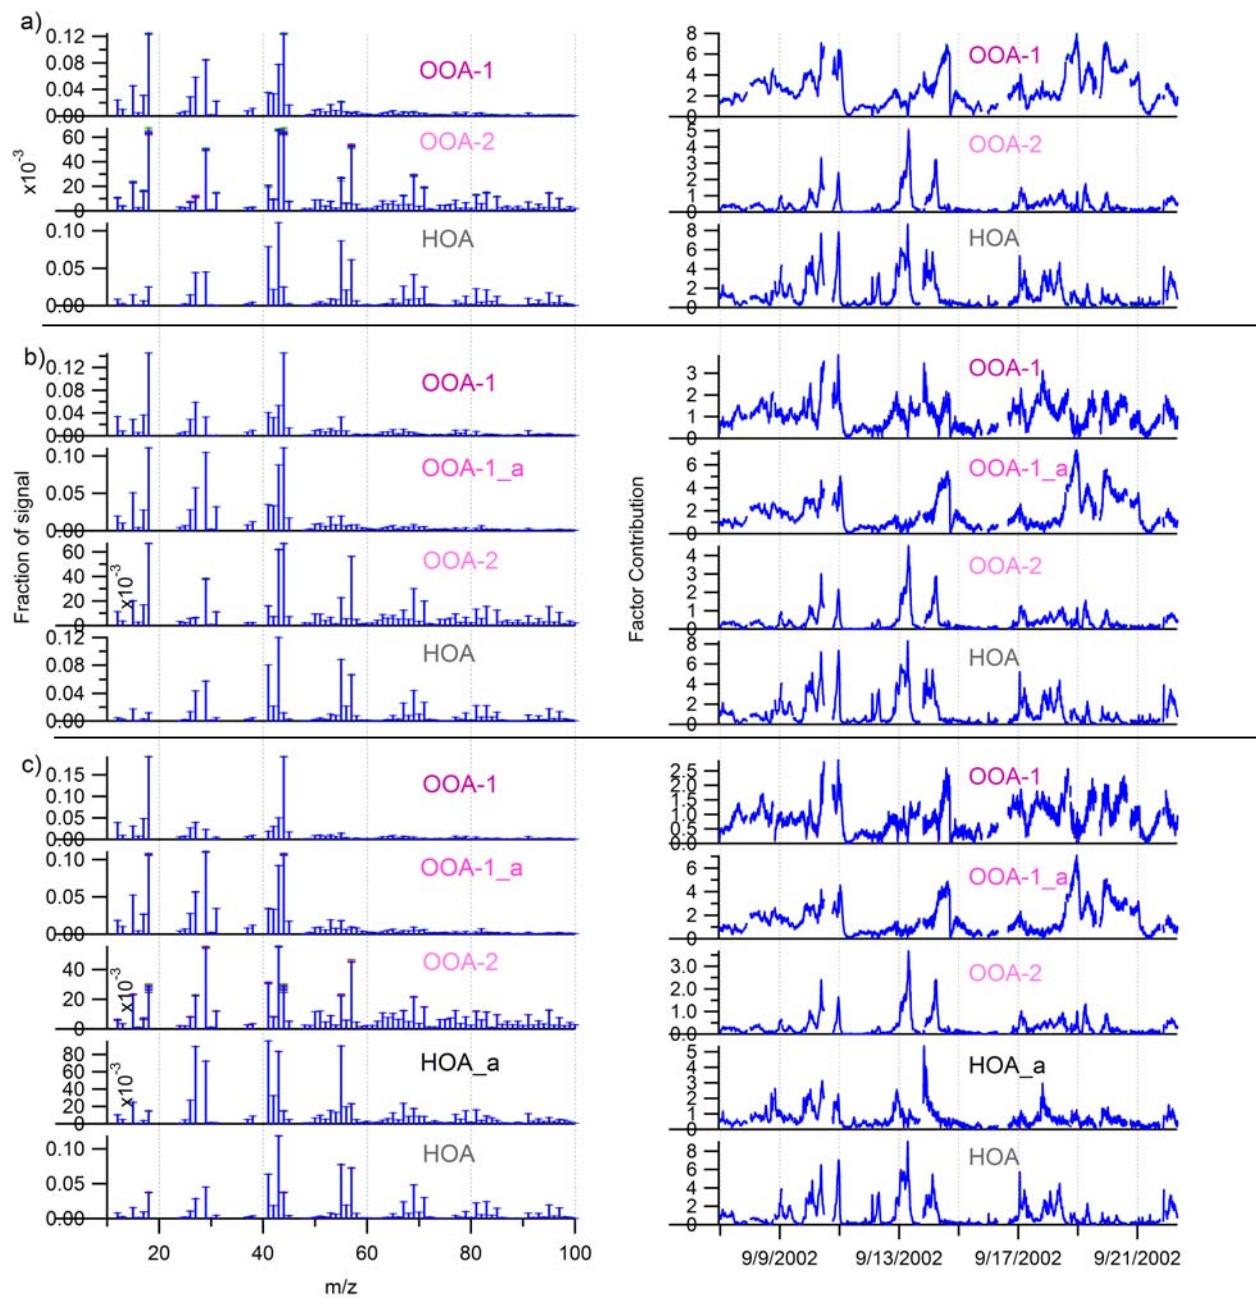

98  
 99 Figure S6. Solutions of the real Pittsburgh dataset from 64 random starts computing a) 3 factors,  
 100 b) 4 factors, and c) 5 factors.

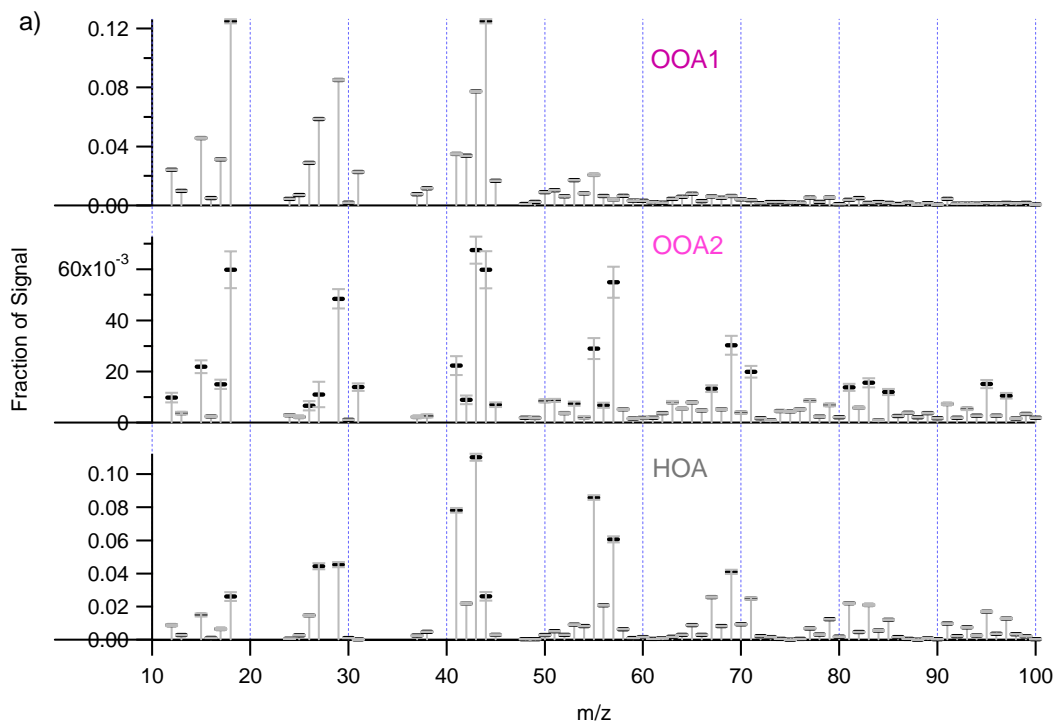

101

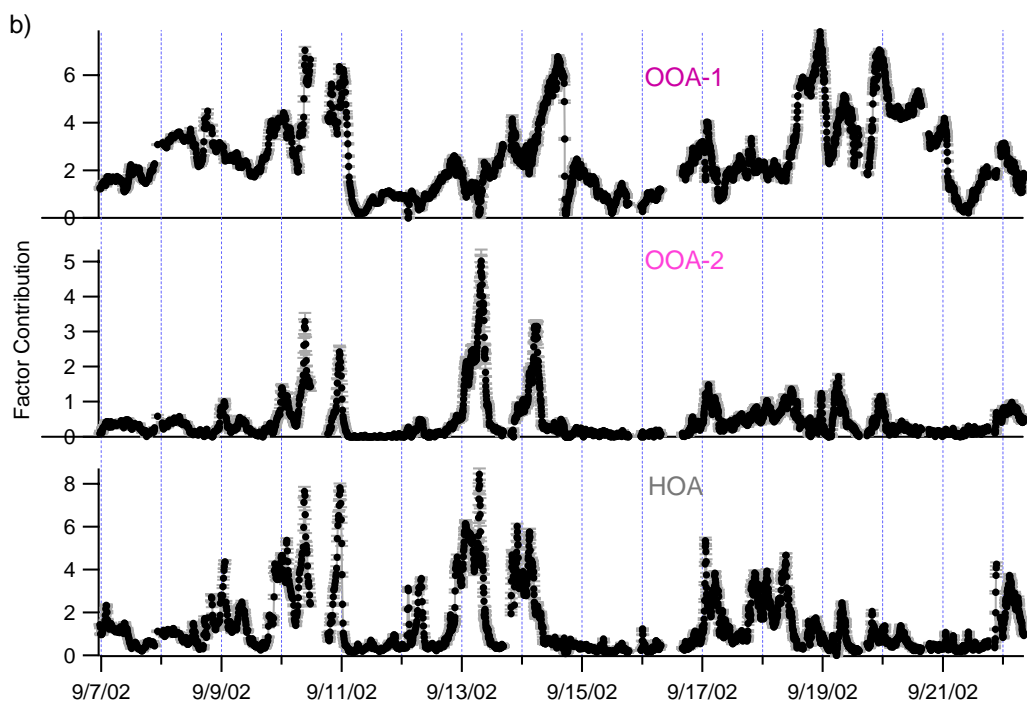

102

103 Figure S7. Results from bootstrapping analysis of the 3-factor solution of the real Pittsburgh  
 104 case. Average (black) with  $1-\sigma$  error bars (grey) are shown for factor a) MS and b) TS. The  
 105 solutions from multiple FPEAKS (Fig. 10) show a greater range in MS than the  $1-\sigma$  variation  
 106 bars, while the TS show a similar range to the  $1-\sigma$  variation bars.

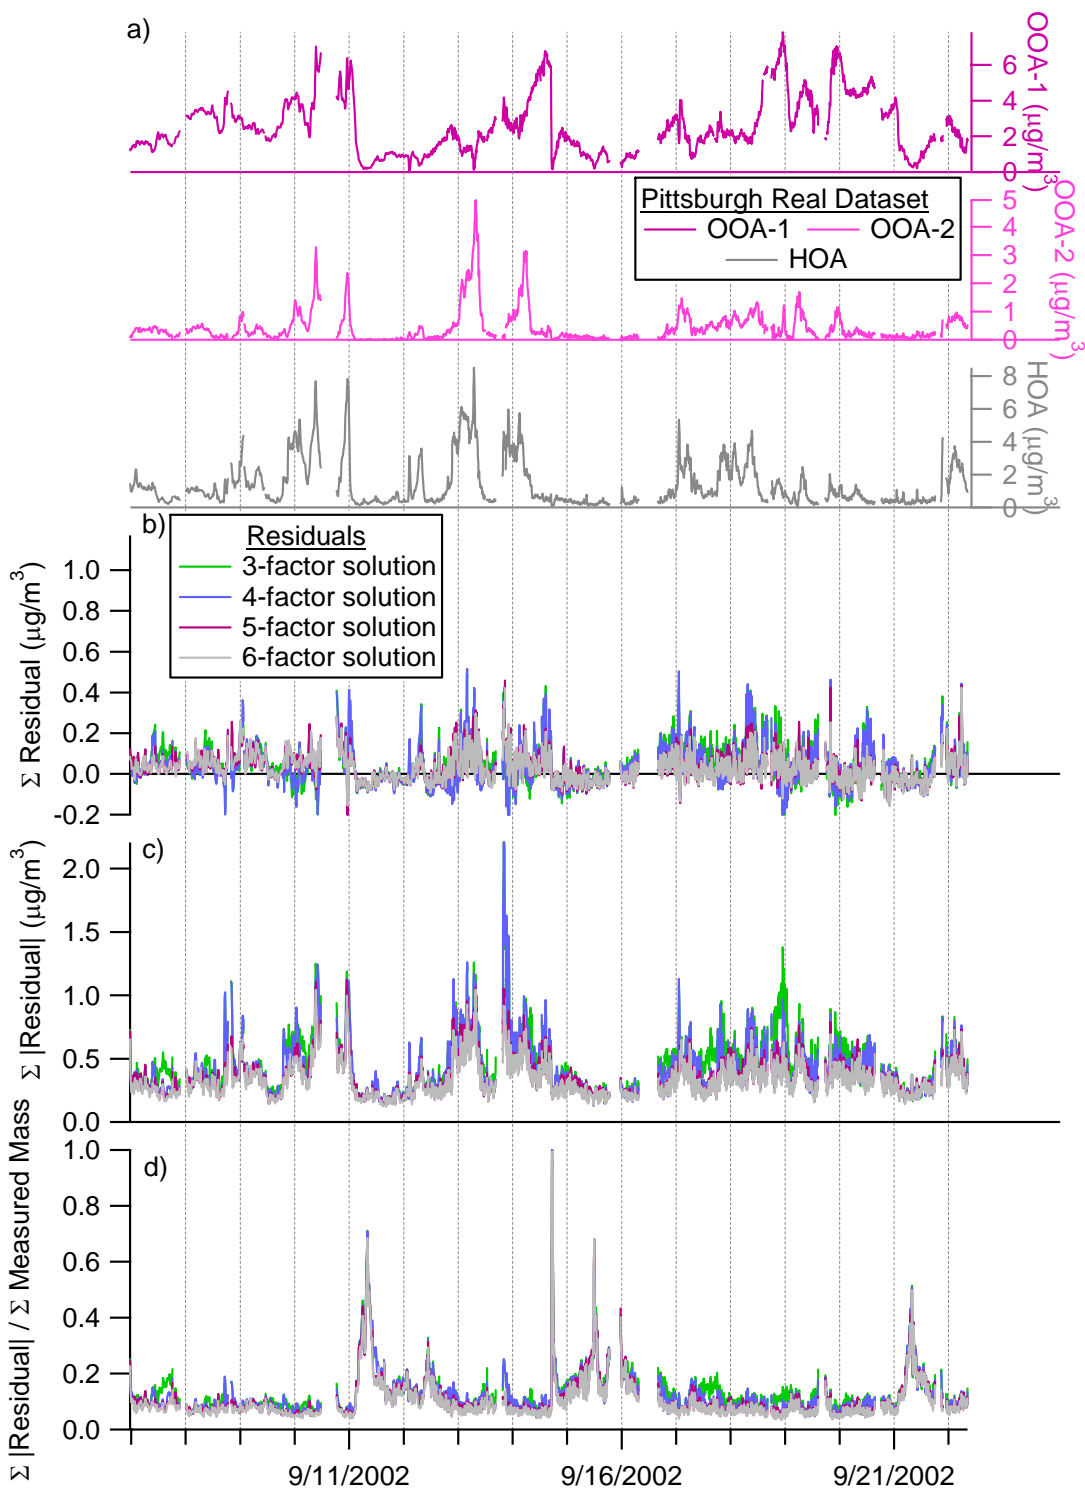

107  
 108 Figure S8. a) OOA-1, OOA-2, and HOA time series from the 3-factor solution of the real  
 109 Pittsburgh dataset. b) Total Residual, c) Total absolute residual, and d) absolute residual  
 110 normalized by total signal for the 3- to 6-factor solutions of the real Pittsburgh case.



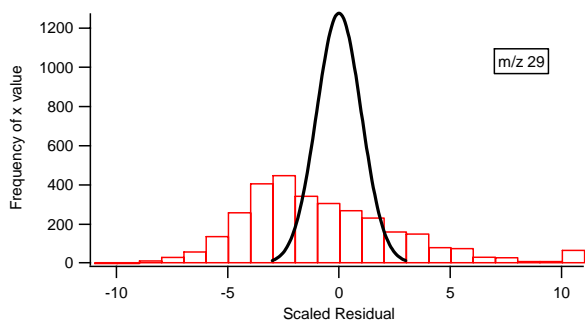

111

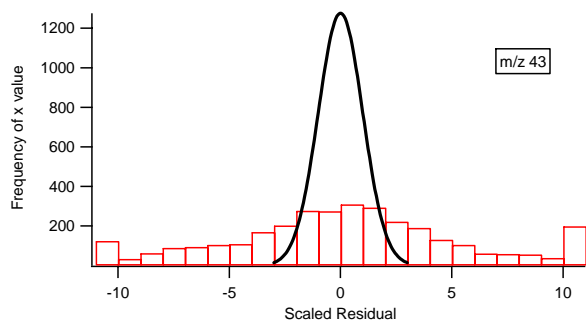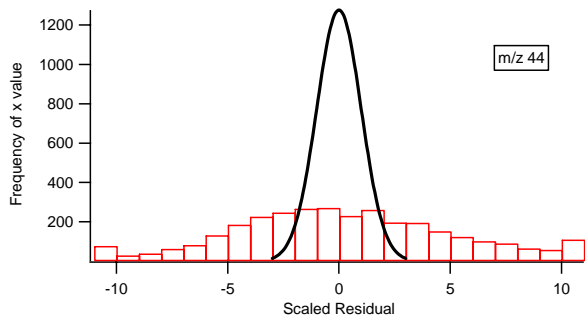

112

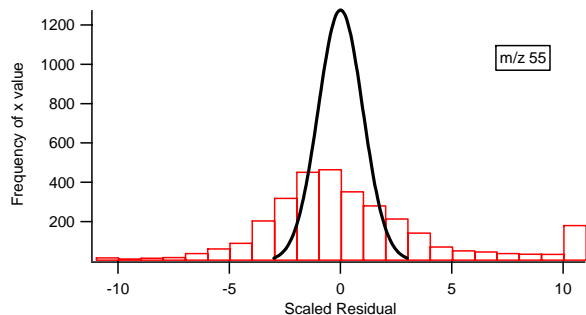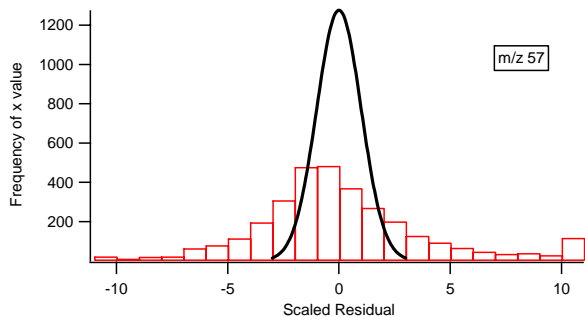

113

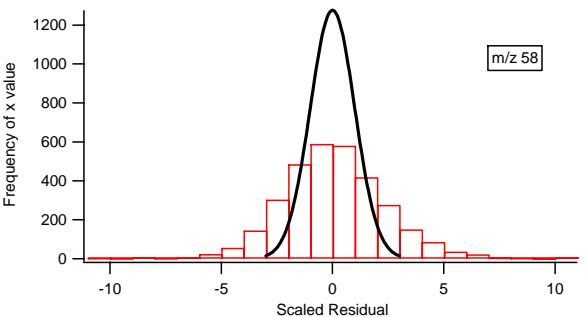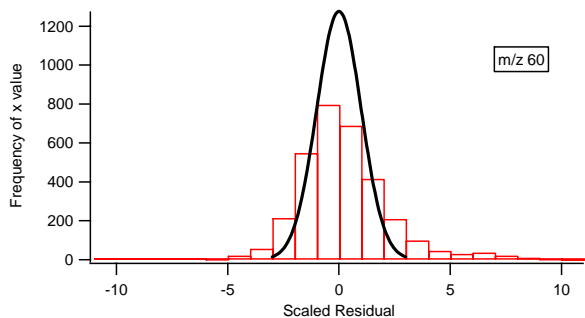

114

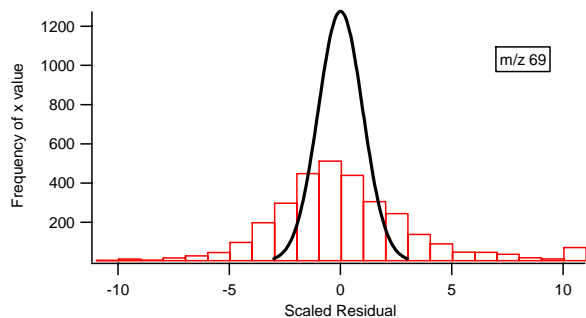

115 Figure S9. Histograms (red) of scaled residuals of selected  $m/z$ 's from the 3-factor solution of  
 116 the real Pittsburgh case. The first bin includes all scaled residuals  $< -10$ ; the last bin includes all  
 117 scaled residuals  $> 10$ . A Gaussian distribution (mean = 0,  $\sigma = 1$ , multiplied by 3199 to have the  
 118 same area as the histogram) is shown in black to guide the eye.

119

120

121

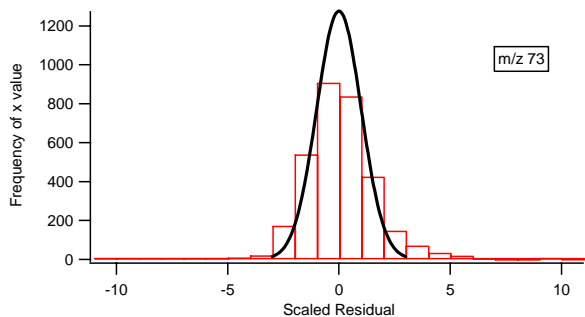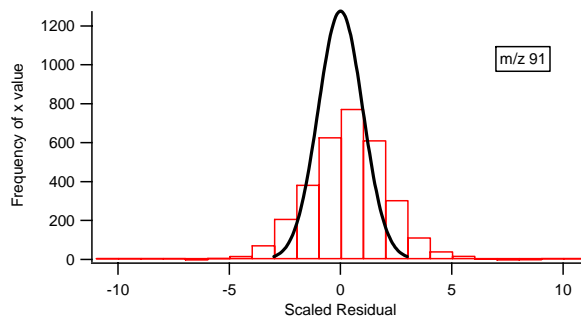

122

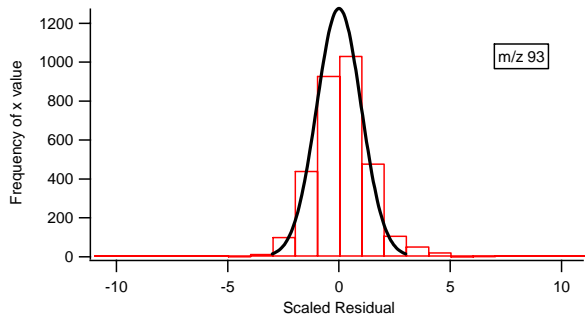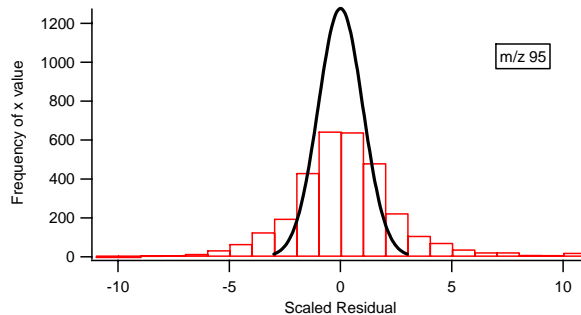

123

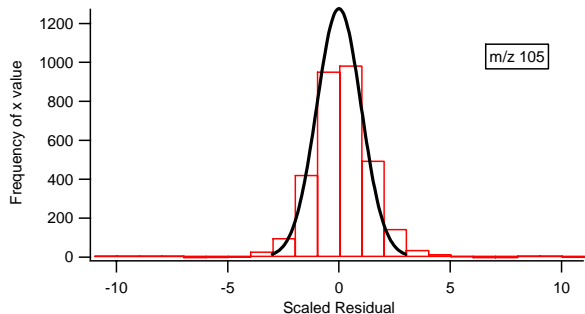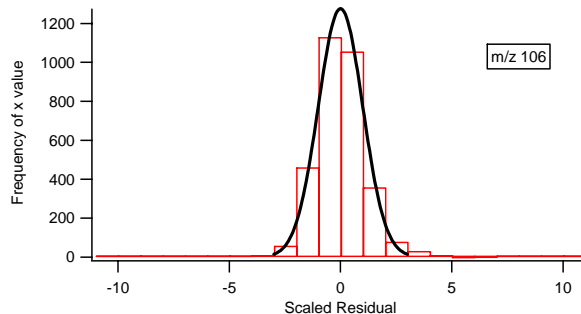

124

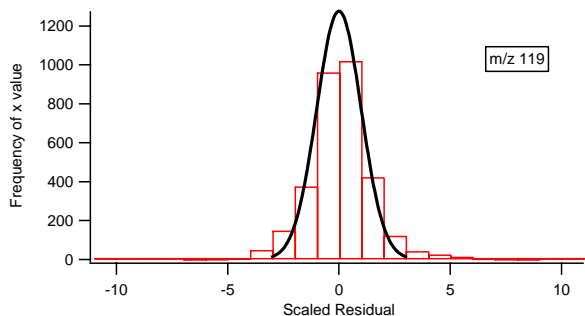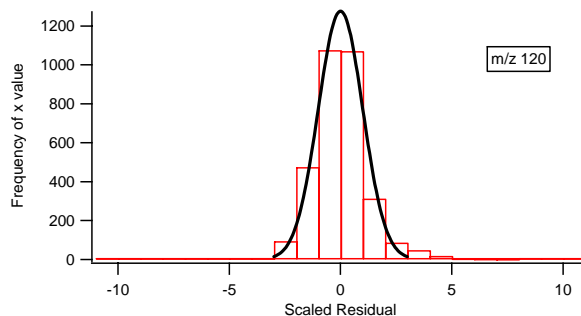

125 Figure S9 cont.

126

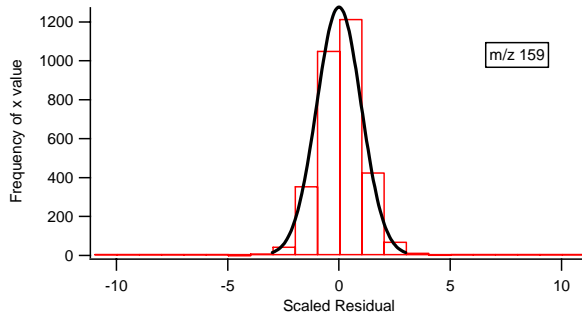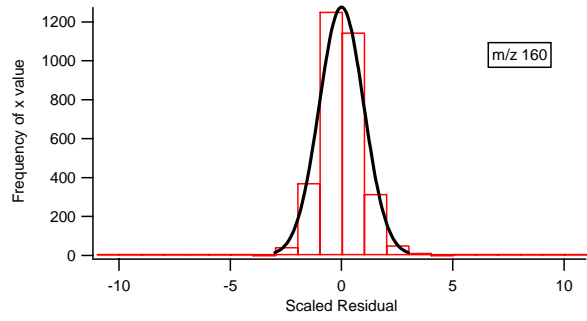

127

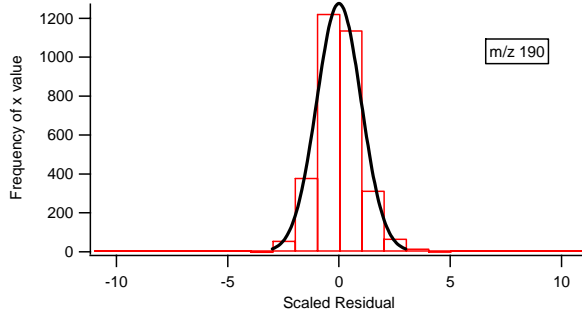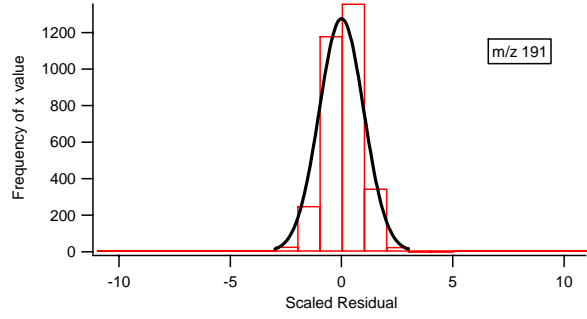

128

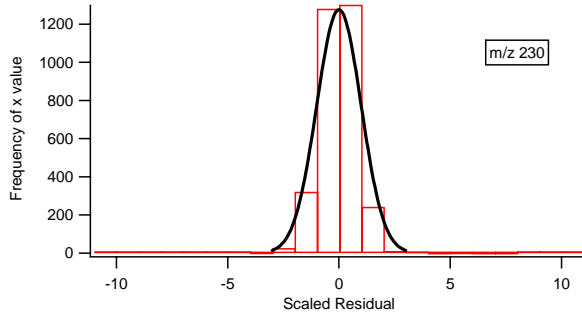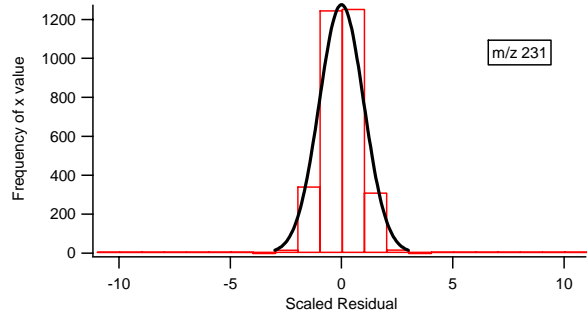

129

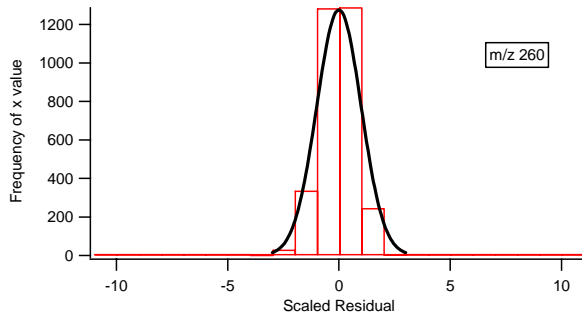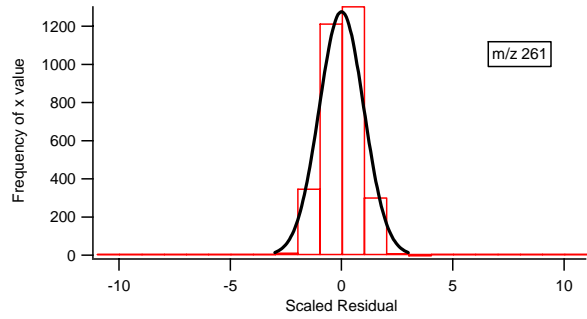

130 Figure S9 cont.

131

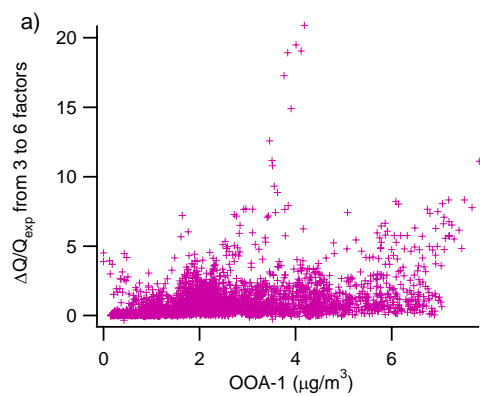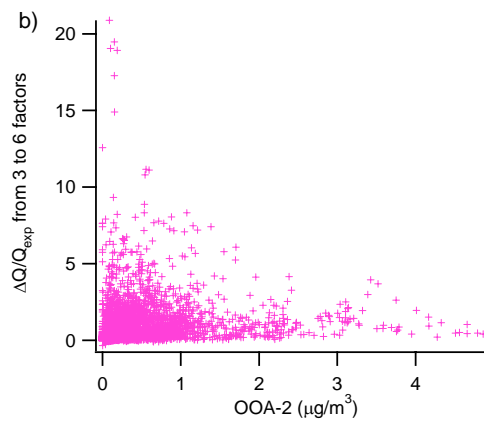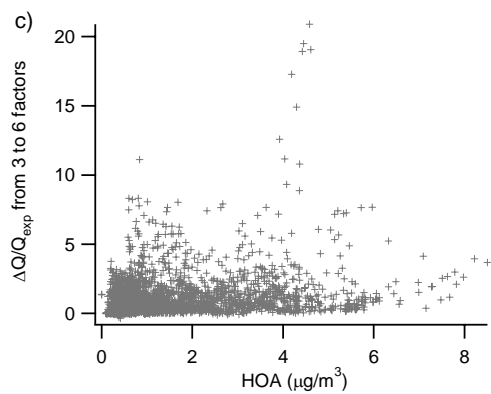

134 Figure S10. Change in  $Q/Q_{\text{exp}}$  in the real Pittsburgh dataset from 3 to 6 factors vs. a) OOA-1  
 135 contribution, b) OOA-2 contribution, and c) HOA contribution from the 3-factor solution.

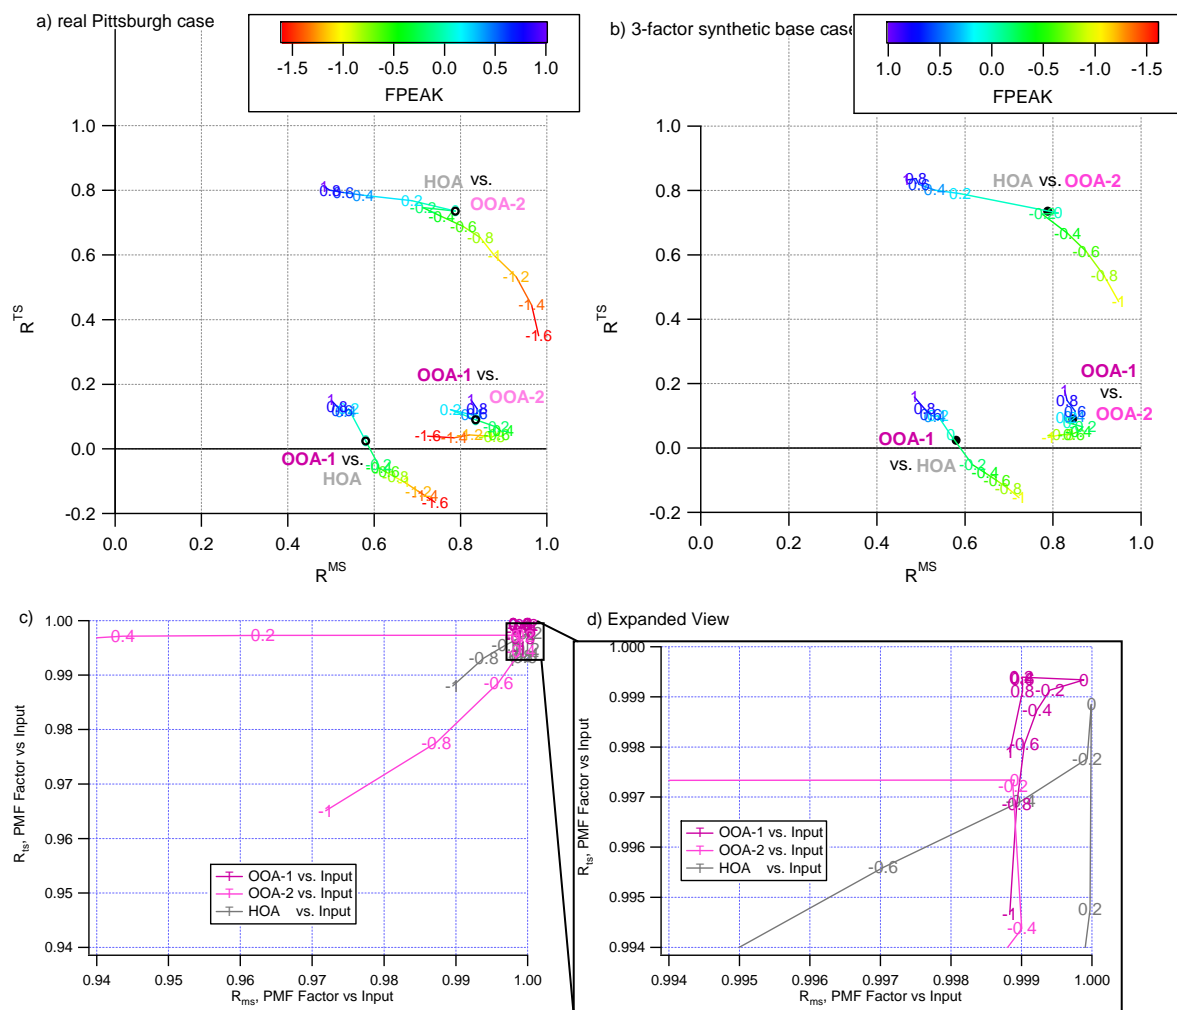

136

137

138 Fig. S11. Correlations of PMF factors to each other as they change with FPEAK for a) the real  
 139 Pittsburgh case and b) the three-factor synthetic base case. The red labels denote the correlations  
 140 of the input factors. Traces are colored by FPEAK and numbers denote the FPEAK of each  
 141 solution. Black dots in b) indicate the correlation of the factors in the input. c) Correlation of  
 142 the PMF factors to the input factors for the three-factor synthetic case. d) Expansion of c).

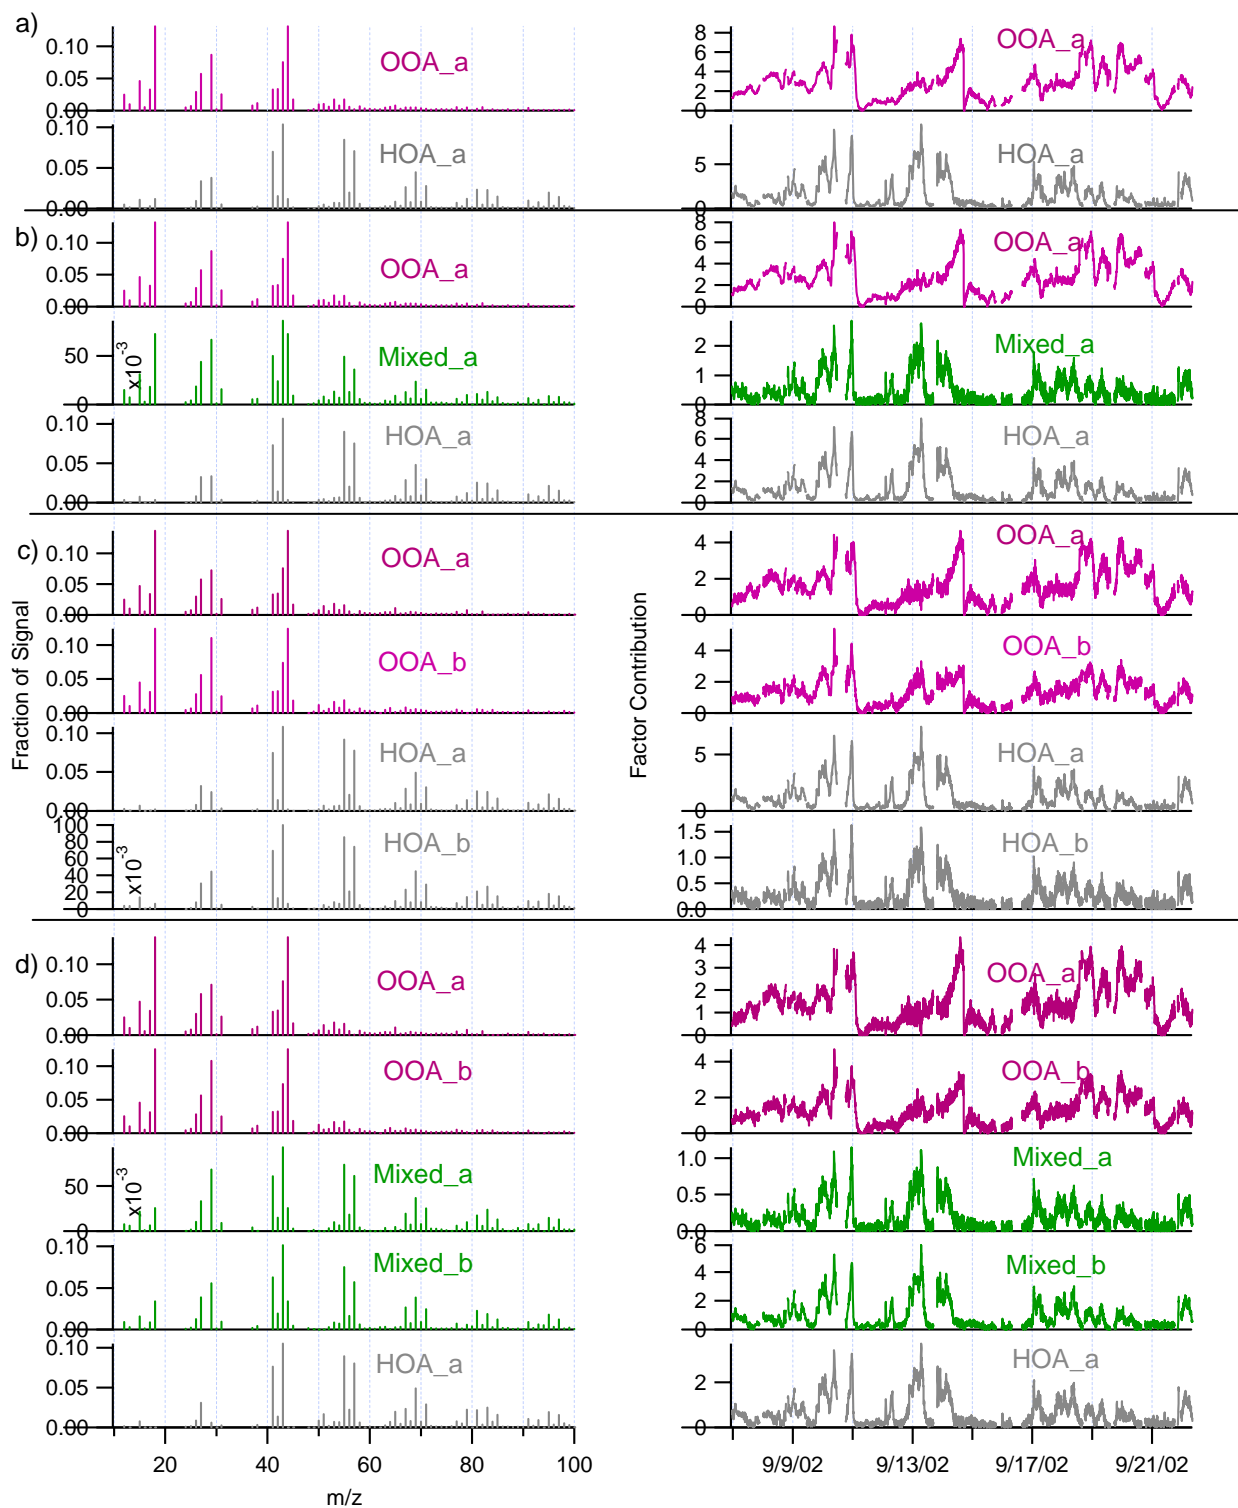

143

144 Figure S12. PMF solutions of the 2-factor synthetic base case with a) 2 factors, b) 3 factors, c) 4

145 factors, and d) 5 factors.

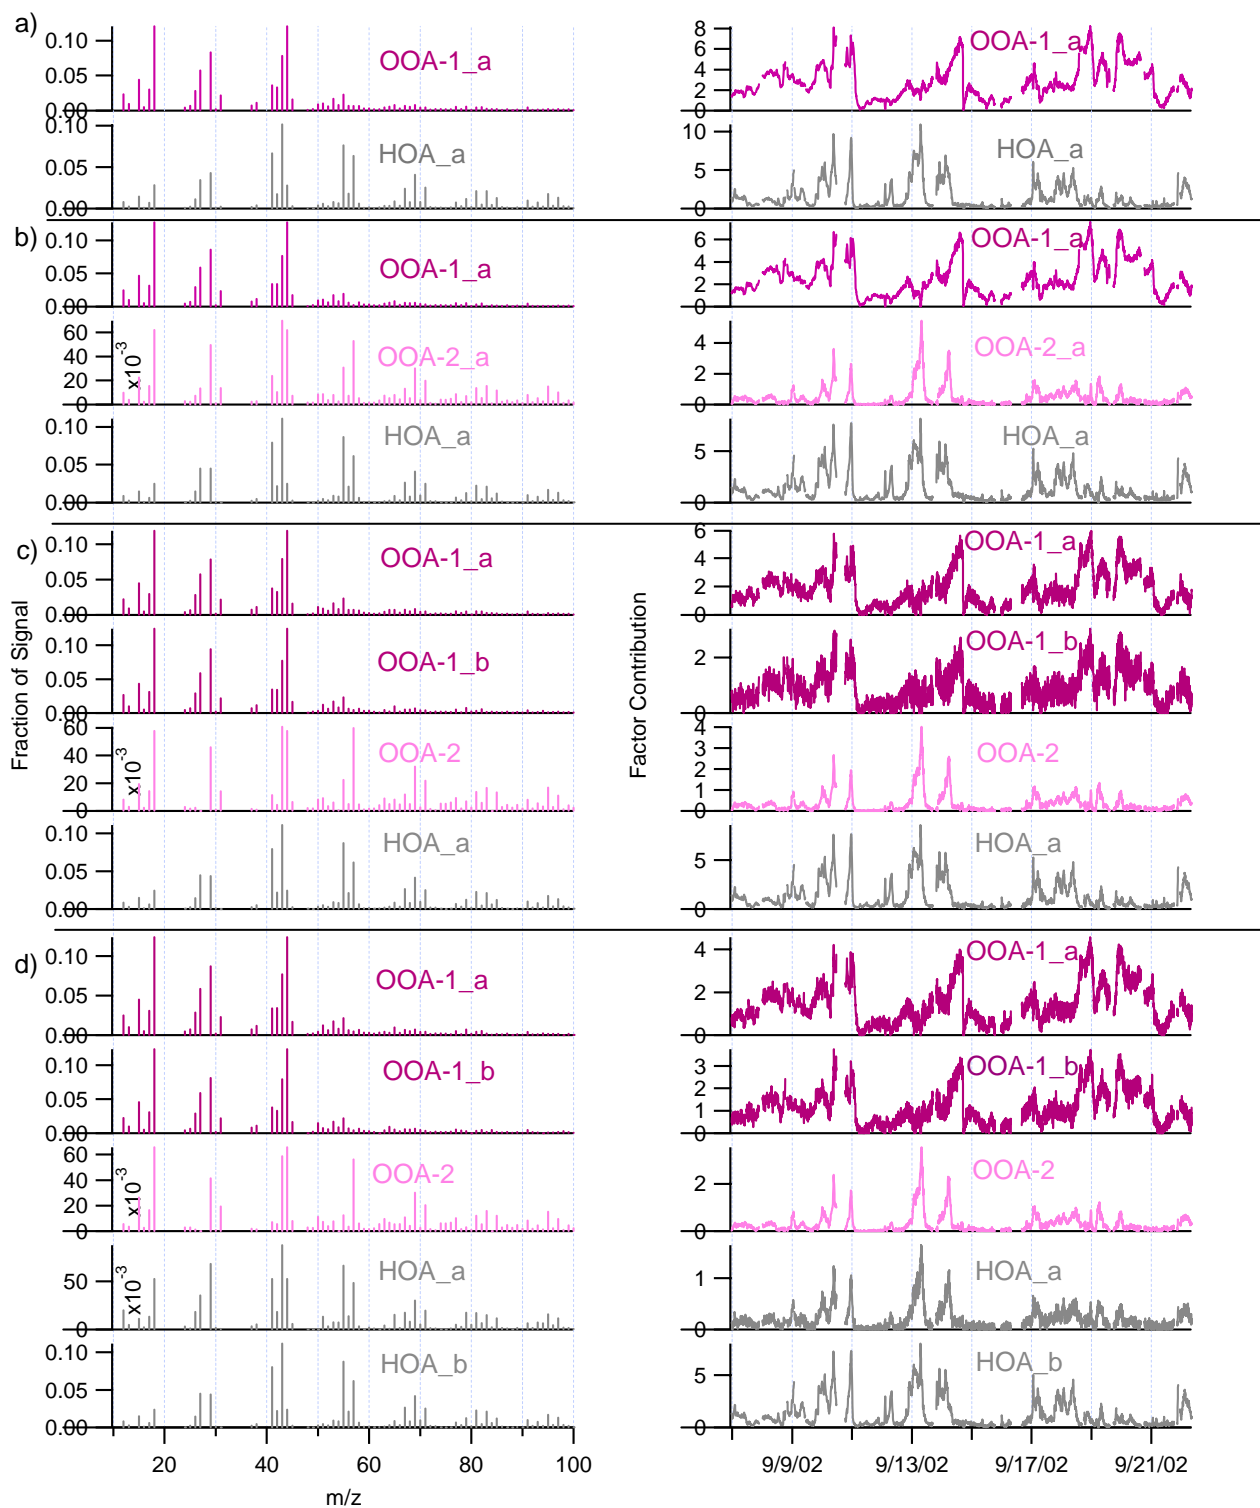

146

147 Figure S13. PMF solutions of the 3-factor synthetic base case with a) 2 factors, b) 3 factors, c) 4

148 factors, and d) 5 factors.

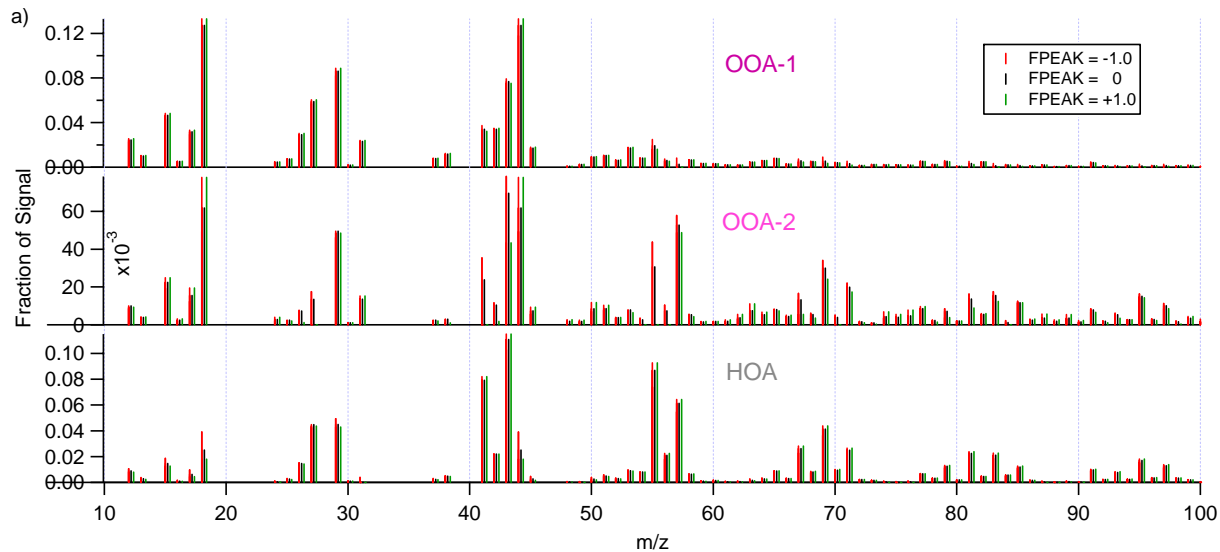

149

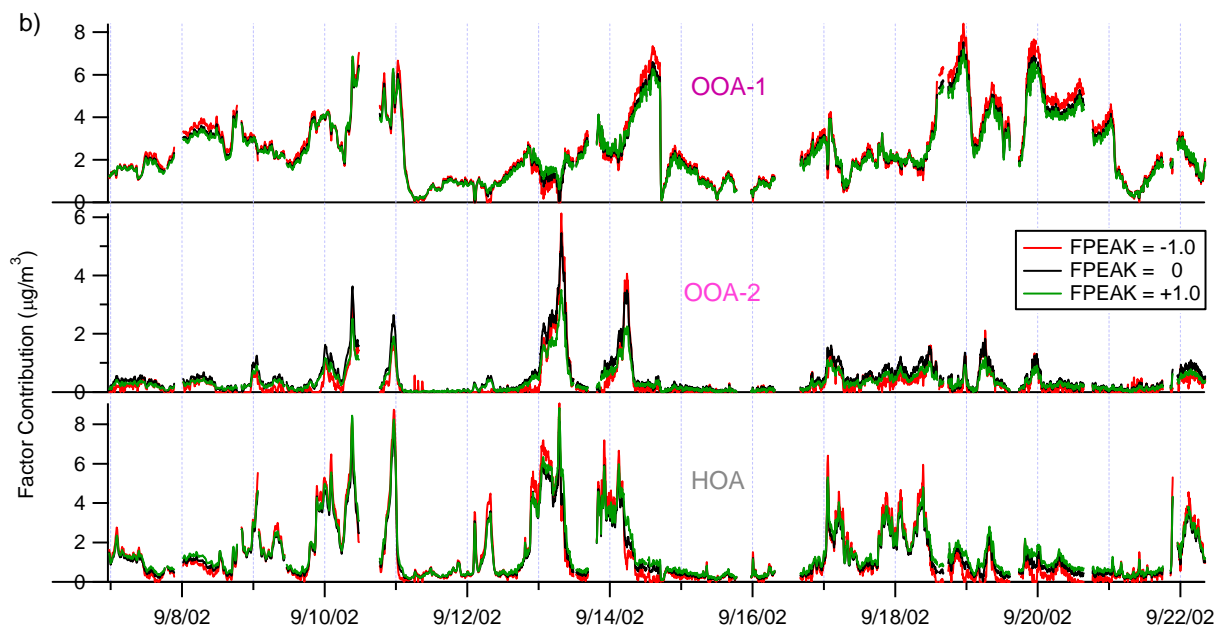

150

151 Figure S14. 3-factor solutions of the 3-factor synthetic base case for selected “good” FPEAK

152 values.



153

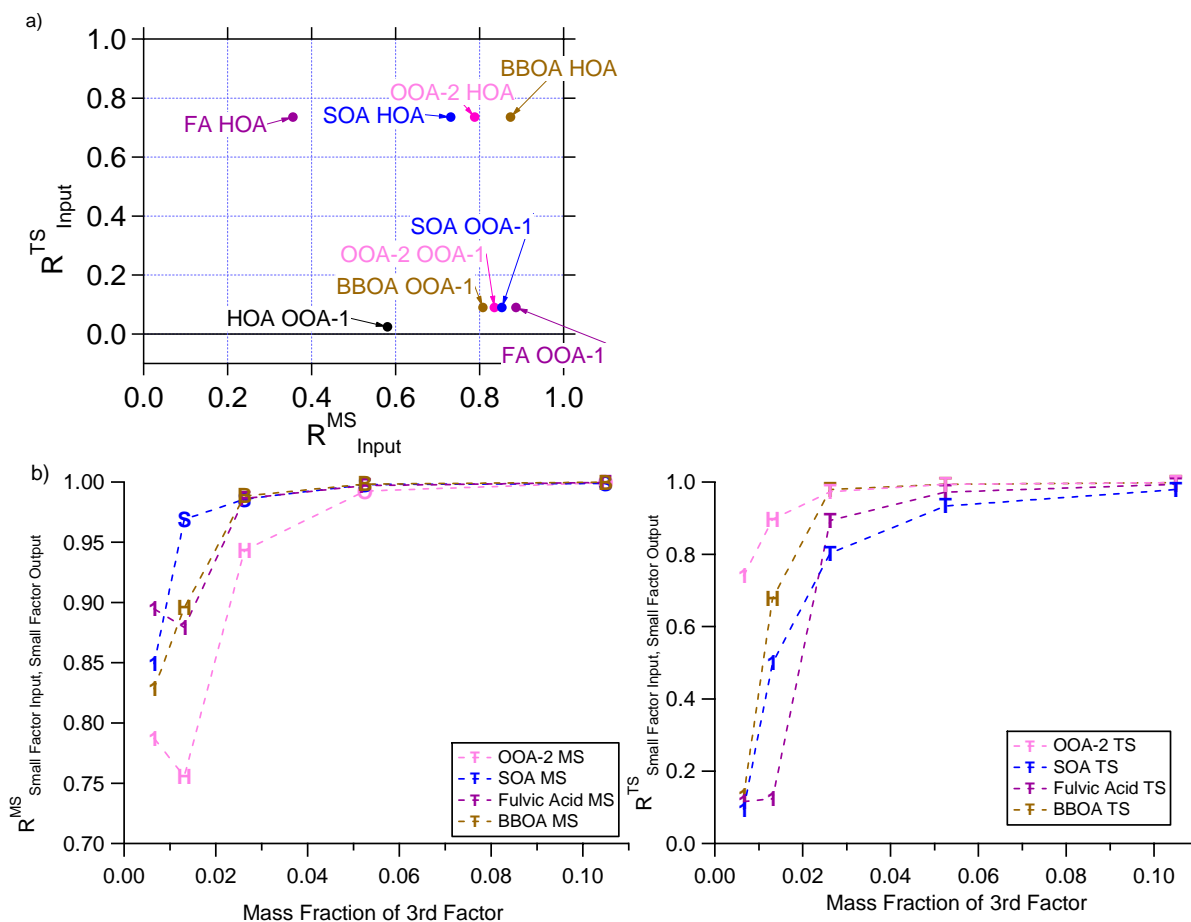

154

155 Fig. S15. a) Correlations between 3-factor real output and all synthetic input cases. b) Retrieval  
 156 correlations between PMF and input TS and MS versus mass fraction of different third factors in  
 157 synthetic cases. Markers denote the resemblance of the factors to the input MS or TS. For the  
 158 MS, O, S, F, and B refer to OOA-2, SOA, FA, and BBOA, respectively. For the TS, T refers to  
 159 the input TS. For both cases, H and I refer to HOA and OOA-1, respectively.

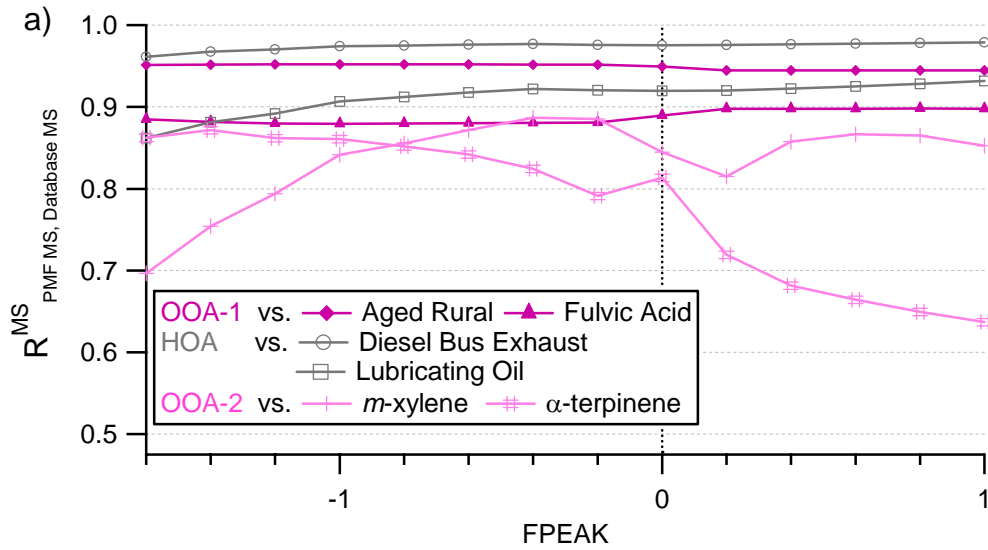

160

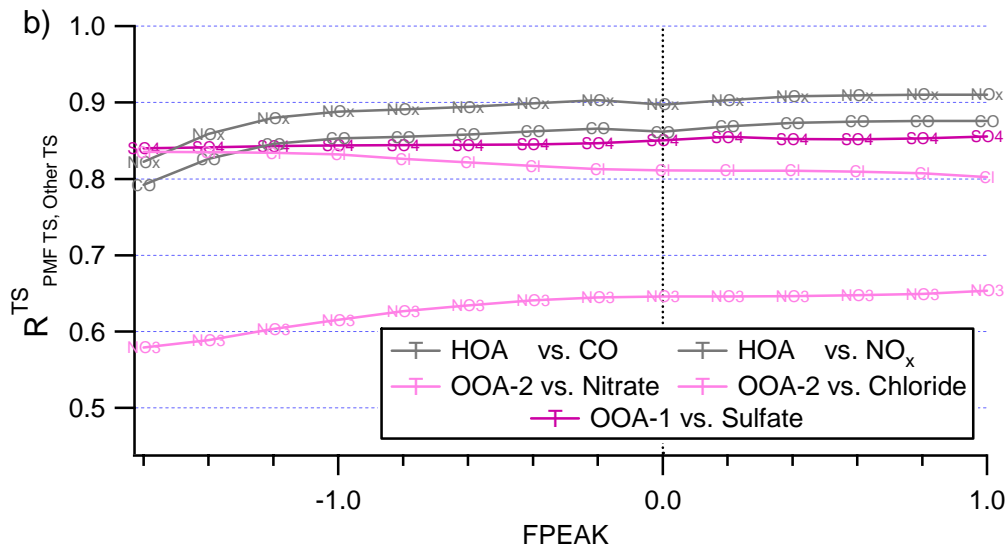

161

162 Fig. S16. Correlation versus FPEAK between PMF factor a) MS and selected reference MS,  
 163 and b) TS and tracer TS.

164 Table S1. Correlations between PMF factor TS and tracer species.  
165

|                         | U <sup>TS</sup> | R <sup>TS</sup> |
|-------------------------|-----------------|-----------------|
| OOA-1 vs. Sulfate       | 0.95            | 0.85            |
| OOA-2 vs. Nitrate       | 0.79            | 0.79            |
| OOA-2 vs. Chloride      | 0.82            | 0.82            |
| HOA vs. CO              | 0.93            | 0.93            |
| HOA vs. NO <sub>x</sub> | 0.95            | 0.95            |
| HOA vs. EC              | 0.93            | 0.83            |

166

167 Table S2. Correlations between PMF factor and selected reference MS from the AMS spectral database.

| Reference Spectrum            | a) OOA-2, Real Data<br>3-factor solution |                         |                 |                        | b) OOA-1a, Real Data<br>4-factor solution |                         |                 |                        | c) "mixed" Factor, 2-factor<br>Synthetic Data<br>3-factor solution |                        |      |            |
|-------------------------------|------------------------------------------|-------------------------|-----------------|------------------------|-------------------------------------------|-------------------------|-----------------|------------------------|--------------------------------------------------------------------|------------------------|------|------------|
|                               | UC <sup>MS</sup>                         | UC <sup>MS</sup> m/z>44 | R <sup>MS</sup> | R <sup>MS</sup> m/z>44 | UC <sup>MS</sup>                          | UC <sup>MS</sup> m/z>44 | R <sup>MS</sup> | R <sup>MS</sup> m/z>44 | U <sup>MS</sup>                                                    | U <sup>MS</sup> m/z>44 | RMS  | RMS m/z>44 |
| HOA Pittsburgh (Zhang et al.) | 0.74                                     | 0.91                    | 0.71            | 0.91                   | 0.37                                      | 0.69                    | 0.32            | 0.65                   | 0.82                                                               | 0.98                   | 0.92 | 0.99       |
| Diesel Bus Exhaust            | 0.90                                     | 0.93                    | 0.89            | 0.93                   | 0.68                                      | 0.63                    | 0.65            | 0.59                   | 0.92                                                               | 0.97                   | 0.96 | 0.98       |
| Lubricating Oil               | 0.74                                     | 0.92                    | 0.71            | 0.93                   | 0.32                                      | 0.54                    | 0.27            | 0.50                   | 0.76                                                               | 0.93                   | 0.86 | 0.95       |
| OOA Pittsburgh (Zhang et al.) | 0.83                                     | 0.56                    | 0.82            | 0.47                   | 0.96                                      | 0.94                    | 0.96            | 0.93                   | 0.86                                                               | 0.71                   | 0.71 | 0.59       |
| aged rural                    | 0.84                                     | 0.78                    | 0.83            | 0.73                   | 0.98                                      | 0.96                    | 0.98            | 0.95                   | 0.87                                                               | 0.91                   | 0.73 | 0.85       |
| Fulvic Acid                   | 0.72                                     | 0.71                    | 0.72            | 0.59                   | 0.97                                      | 0.91                    | 0.97            | 0.90                   | 0.69                                                               | 0.78                   | 0.50 | 0.69       |
| $\alpha$ -pinene              | 0.78                                     | 0.66                    | 0.75            | 0.62                   | 0.74                                      | 0.91                    | 0.73            | 0.90                   | 0.93                                                               | 0.86                   | 0.90 | 0.81       |
| $\beta$ -caryophyllene        | 0.82                                     | 0.71                    | 0.80            | 0.65                   | 0.71                                      | 0.93                    | 0.69            | 0.92                   | 0.94                                                               | 0.86                   | 0.92 | 0.81       |
| linaloolSOA                   | 0.77                                     | 0.62                    | 0.75            | 0.56                   | 0.68                                      | 0.83                    | 0.66            | 0.81                   | 0.87                                                               | 0.74                   | 0.81 | 0.64       |
| $\alpha$ -terpinene           | 0.83                                     | 0.74                    | 0.81            | 0.69                   | 0.75                                      | 0.91                    | 0.73            | 0.90                   | 0.94                                                               | 0.88                   | 0.90 | 0.83       |
| m-xylene                      | 0.84                                     | 0.61                    | 0.84            | 0.53                   | 0.94                                      | 0.82                    | 0.94            | 0.78                   | 0.84                                                               | 0.69                   | 0.69 | 0.59       |
| Diesel Exhaust, 0.25 hr       | 0.83                                     | 0.89                    | 0.80            | 0.86                   | 0.57                                      | 0.81                    | 0.53            | 0.78                   | 0.90                                                               | 0.91                   | 0.95 | 0.91       |
| Diesel Exhaust, 2.25 hr       | 0.92                                     | 0.85                    | 0.90            | 0.81                   | 0.80                                      | 0.89                    | 0.78            | 0.87                   | 0.98                                                               | 0.91                   | 0.94 | 0.90       |
| Diesel Exhaust, 4.25 hr       | 0.92                                     | 0.85                    | 0.91            | 0.80                   | 0.86                                      | 0.90                    | 0.86            | 0.89                   | 0.97                                                               | 0.92                   | 0.91 | 0.90       |
| Ceanothus BBOA                | 0.88                                     | 0.85                    | 0.85            | 0.80                   | 0.70                                      | 0.84                    | 0.68            | 0.81                   | 0.94                                                               | 0.90                   | 0.94 | 0.89       |
| Chamise BBOA                  | 0.92                                     | 0.86                    | 0.90            | 0.83                   | 0.82                                      | 0.86                    | 0.81            | 0.84                   | 0.93                                                               | 0.94                   | 0.85 | 0.93       |
| Palmetto BBOA                 | 0.89                                     | 0.84                    | 0.87            | 0.80                   | 0.81                                      | 0.89                    | 0.79            | 0.87                   | 0.97                                                               | 0.95                   | 0.93 | 0.90       |
| Juniper BBOA                  | 0.92                                     | 0.87                    | 0.90            | 0.83                   | 0.84                                      | 0.85                    | 0.83            | 0.82                   | 0.97                                                               | 0.94                   | 0.94 | 0.94       |
| Manzanita BBOA                | 0.88                                     | 0.85                    | 0.85            | 0.81                   | 0.72                                      | 0.85                    | 0.70            | 0.83                   | 0.95                                                               | 0.91                   | 0.92 | 0.94       |
| Ponderosa Pine Duff BBOA      | 0.81                                     | 0.83                    | 0.77            | 0.78                   | 0.56                                      | 0.80                    | 0.51            | 0.76                   | 0.88                                                               | 0.90                   | 0.93 | 0.89       |
| Ponderosa BBOA                | 0.85                                     | 0.85                    | 0.83            | 0.81                   | 0.64                                      | 0.82                    | 0.61            | 0.78                   | 0.93                                                               | 0.91                   | 0.91 | 0.88       |
| Rice Straw BBOA               | 0.84                                     | 0.85                    | 0.80            | 0.81                   | 0.71                                      | 0.85                    | 0.69            | 0.84                   | 0.93                                                               | 0.88                   | 0.91 | 0.87       |
| Sage and Rabbit Brush BBOA    | 0.88                                     | 0.86                    | 0.87            | 0.82                   | 0.93                                      | 0.89                    | 0.93            | 0.87                   | 0.91                                                               | 0.94                   | 0.79 | 0.92       |
| Wax Myrtle BBOA               | 0.89                                     | 0.84                    | 0.87            | 0.80                   | 0.75                                      | 0.87                    | 0.73            | 0.84                   | 0.95                                                               | 0.92                   | 0.93 | 0.91       |
| Levoglucosan                  | 0.64                                     | 0.45                    | 0.61            | 0.42                   | 0.46                                      | 0.33                    | 0.43            | 0.29                   | 0.67                                                               | 0.46                   | 0.61 | 0.41       |

168

169 Table S3. Correlations between input factors for the 3-factor synthetic cases.

|       | OOA-2    |          | BBOA     |          | FA       |          | SOA      |          | OOA-1    |          |
|-------|----------|----------|----------|----------|----------|----------|----------|----------|----------|----------|
|       | $U^{MS}$ | $U^{TS}$ | $U^{MS}$ | $U^{TS}$ | $U^{MS}$ | $U^{TS}$ | $U^{MS}$ | $U^{TS}$ | $U^{MS}$ | $U^{TS}$ |
| HOA   | 0.81     | 0.84     | 0.88     | 0.84     | 0.39     | 0.84     | 0.76     | 0.84     | 0.61     | 0.60     |
| OOA-1 | 0.84     | 0.55     | 0.81     | 0.55     | 0.89     | 0.55     | 0.86     | 0.55     |          |          |

|       | OOA-2    |          | BBOA     |          | FA       |          | SOA      |          | OOA-1    |          |
|-------|----------|----------|----------|----------|----------|----------|----------|----------|----------|----------|
|       | $R^{MS}$ | $R^{TS}$ | $R^{MS}$ | $R^{TS}$ | $R^{MS}$ | $R^{TS}$ | $R^{MS}$ | $R^{TS}$ | $R^{MS}$ | $R^{TS}$ |
| HOA   | 0.79     | 0.74     | 0.87     | 0.74     | 0.36     | 0.74     | 0.73     | 0.74     | 0.58     | 0.02     |
| OOA-1 | 0.83     | 0.09     | 0.81     | 0.09     | 0.89     | 0.09     | 0.85     | 0.09     |          |          |

170
